# Supplementary material
Source: MDPI journal article supplement (https://www.mdpi.com/2071-1050/16/9/3660)
Supplement: s1 [file s1]

## Supplementary Material

# Cellulose-Based Waste in a Close Loop as an Adsorbent for Removing Dyes from Textile Industry Wastewater

Marija Vukčević <sup>1,\*</sup>, Marina Maletić <sup>2</sup>, Biljana Pejić <sup>1,3</sup>, Ana Kalijadis <sup>4</sup>, Mirjana Kostić <sup>1</sup>, Katarina Trivunac <sup>1</sup> and Aleksandra Perić Grujić <sup>1</sup>

<sup>1</sup> Faculty of Technology and Metallurgy, University of Belgrade, Karnegijeva 4, 11000 Belgrade, Serbia; biljanap@tmf.bg.ac.rs (B.P.); kostic@tmf.bg.ac.rs (M.K.); trivunac@tmf.bg.ac.rs (K.T.); alexp@tmf.bg.ac.rs (A.P.G.)

<sup>2</sup> Innovation Center of Faculty of Technology and Metallurgy, Karnegijeva 4, 11000 Belgrade, Serbia; mvukasinovic@tmf.bg.ac.rs

<sup>3</sup> Textile School for Design, Technology and Management, Academy of Technical and Art Applied Studies Belgrade, Starine Novaka 24, 11000 Belgrade, Serbia

<sup>4</sup> Department of Materials, "VINČA" Institute of Nuclear Sciences—National Institute of the Republic of Serbia, University of Belgrade, Mike Petrovica Alasa 12–14, 11000 Belgrade, Serbia; ana.kalijadis@vin.bg.ac.rs

\* Correspondence: marijab@tmf.bg.ac.rs

**Table S1.** The raw wastewater sampling site description, pH and conductivity of wastewater samples

| Sample | Latitude | Longitude | Site description                                  | Mean annual flow, m <sup>3</sup> /annually | Population equivalent | pH   | Conductivity, $\mu$ S |
|--------|----------|-----------|---------------------------------------------------|--------------------------------------------|-----------------------|------|-----------------------|
| W1     | 44.8257  | 20.4247   | Catchment area of 323 ha                          | 1,447,962                                  | 56,179                | 9.16 | 633                   |
| W2     | 44.7976  | 20.4346   | The largest WW canal; a catchment area of 7277 ha | 48,723,120                                 | 518,224               | 8.20 | 847                   |
| W3     | 44.8118  | 20.4494   | Catchment area of 113 ha                          | 7,726,320                                  | 23,041                | 8.28 | 759                   |

**Table S2.** Pseudo-first and pseudo-second order adsorption rate constants, calculated using appropriate model, and experimental  $q_e$  values for adsorption of selected dyes on cotton-based adsorbents

| Dye                      | Sample             | Cott   | Cott <sub>c</sub> | Cott <sub>ac</sub> | Cott/PES | Cott/PES <sub>c</sub> | Cott/PES <sub>ac</sub> |
|--------------------------|--------------------|--------|-------------------|--------------------|----------|-----------------------|------------------------|
| MO                       | $q_{e,exp}$        | 0.250  | 0.330             | 99.8               | 0.310    | 0.500                 | 37.8                   |
| MB                       | mg g <sup>-1</sup> | 10.8   | 2.85              | 99.3               | 6.30     | 1.62                  | 79.4                   |
| Pseudo-first order model |                    |        |                   |                    |          |                       |                        |
| MO                       | $q_{e,cal}$        | 0.231  | 0.283             | 96.3               | 0.282    | 0.401                 | 33.5                   |
| MB                       | mg g <sup>-1</sup> | 10.3   | 2.59              | 99.9               | 5.82     | 1.40                  | 72.3                   |
| MO                       | $k_1$              | 0.0343 | 0.0798            | 0.298              | 0.0481   | 0.0877                | 0.159                  |
| MB                       | min <sup>-1</sup>  | 0.109  | 0.198             | 0.393              | 0.117    | 0.181                 | 0.0421                 |
| MO                       | $R^2$              | 0.9633 | 0.8087            | 0.6780             | 0.9163   | 0.5902                | 0.3417                 |
| MB                       |                    | 0.8356 | 0.6727            | 0.9831             | 0.5421   | 0.6206                | 0.7982                 |

| Pseudo-second order model |                                      |        |        |         |        |        |         |
|---------------------------|--------------------------------------|--------|--------|---------|--------|--------|---------|
| MO                        | $q_{e,cal},$                         | 0.280  | 0.320  | 100     | 0.330  | 0.450  | 36.3    |
| MB                        | mg g <sup>-1</sup>                   | 11.1   | 2.76   | 102     | 6.28   | 1.51   | 82.5    |
| MO                        | $k_2,$                               | 0.130  | 0.318  | 0.00650 | 0.165  | 0.241  | 0.00670 |
| MB                        | g mg <sup>-1</sup> min <sup>-1</sup> | 0.0151 | 0.122  | 0.0137  | 0.0292 | 0.190  | 0.0006  |
| MO                        | $R^2$                                | 0.9813 | 0.9210 | 0.9723  | 0.9357 | 0.7869 | 0.7169  |
| MB                        |                                      | 0.9562 | 0.9163 | 0.6852  | 0.8086 | 0.7806 | 0.8976  |

**Table S3.** Kinetic parameters for MO and MB adsorption on cotton-based adsorbents obtained by Elovich and intraparticle diffusion model

| Material                               | Dye | Cott   | Cott <sub>c</sub> | Cott <sub>ac</sub>    | Cott/PES | Cott/PES <sub>c</sub> | Cott/PES <sub>ac</sub> |
|----------------------------------------|-----|--------|-------------------|-----------------------|----------|-----------------------|------------------------|
| Elovich model                          |     |        |                   |                       |          |                       |                        |
| $R^2$                                  | MO  | 0.9903 | 0.9650            | 0.8748                | 0.9340   | 0.9232                | 0.9411                 |
|                                        | MB  | 0.9315 | 0.9709            | 0.2482                | 0.9310   | 0.8467                | 0.9522                 |
| $\alpha,$<br>mg/g min                  | MO  | 0.0220 | 0.100             | 1.08x10 <sup>6</sup>  | 0.0360   | 0.180                 | 131                    |
|                                        | MB  | 14.6   | 55.2              | 1.32x10 <sup>16</sup> | 10.3     | 11.2                  | 12.6                   |
| $\beta,$<br>g/mg                       | MO  | 16.7   | 18.3              | 0.170                 | 14.3     | 13.2                  | 0.230                  |
|                                        | MB  | 0.660  | 3.66              | 0.410                 | 1.19     | 5.98                  | 0.0700                 |
| $R_E$                                  | MO  | 0.240  | 0.164             | 0.0600                | 0.228    | 0.152                 | 0.117                  |
|                                        | MB  | 0.142  | 0.0961            | 0.0250                | 0.133    | 0.103                 | 0.193                  |
| Intra-particle diffusion               |     |        |                   |                       |          |                       |                        |
| $k_{id,1},$<br>mg/g min <sup>1/2</sup> | MO  | 0.051  | 0.017             | 5.29                  | 0.0872   | 0.024                 | 1.64                   |
|                                        | MB  | 1.10   | 0.082             | 14.9                  | 0.420    | 0.052                 | 4.88                   |
| $C_1,$<br>mg/g                         | MO  | 0.84   | 0.11              | 68                    | 0.0020   | 0.16                  | 20                     |
|                                        | MB  | 3.2    | 1.8               | 52                    | 2.6      | 0.93                  | 17                     |
| $k_{id,2},$<br>mg/g min <sup>1/2</sup> | MO  | 0.022  |                   | 0.51                  | 0.022    |                       | 0.18                   |
|                                        | MB  | 0.49   |                   | 0.009                 | 0.070    |                       |                        |
| $C_2,$<br>mg/g                         | MO  | 0.024  |                   | 94                    | 0.079    |                       | 35                     |
|                                        | MB  | 6.6    |                   | 99                    | 5.4      |                       |                        |
| $k_{id,3},$<br>mg/g min <sup>1/2</sup> | MO  | 0.010  |                   |                       | 0.010    |                       |                        |
|                                        | MB  | 0.063  |                   |                       |          |                       |                        |
| $C_3,$ mg/g                            | MO  | 0.12   |                   |                       | 0.17     |                       |                        |
|                                        | MB  | 9.9    |                   |                       |          |                       |                        |
